# Supplementary material for: Observational partitioning of water and CO 2 fluxes at National Ecological Observatory Network (NEON) sites: a 5-year dataset of soil and plant components for spatial and temporal analysis
Source: Copernicus journal article supplement (doi:10.5194/essd-16-5603-2024), 2024-12-06
Supplement: Supplementary file 1 [file essd-16-5603-2024-supplement.zip]

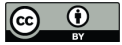

*Supplement of*

**Observational partitioning of water and CO<sub>2</sub> fluxes at National Ecological Observatory Network (NEON) sites: a 5-year dataset of soil and plant components for spatial and temporal analysis**

**Einara Zahn and Elie Bou-Zeid**

*Correspondence to:* Elie Bou-Zeid ([ebouzeid@princeton.edu](mailto:ebouzeid@princeton.edu))

- [essd-16-5603-2024-supplement-title-page.pdf](#)
- [TableSI.xlsx](#)

The copyright of individual parts of the supplement might differ from the article licence.
