# Supplementary material for: Observational partitioning of water and CO 2 fluxes at National Ecological Observatory Network (NEON) sites: a 5-year dataset of soil and plant components for spatial and temporal analysis
Source: Copernicus journal article supplement (doi:10.5194/essd-16-5603-2024), 2024-12-06
Supplement: Supplementary file 1 [file essd-16-5603-2024-supplement.zip]

## Sheet: ABBY
	CEC	REA	CEA	FVSconst_ppm	FVSconst_ratio	FVSlinear	FVSmean	FVSopt	FVSsqrt	CECwconst_ppm	CECwconst_ratio	CECwlinear	CECwmean	CECwopt	CECwsqrt
meanT	13.7342	14.2569	13.8158	15.5043	15.5023	16.4369	15.4978	15.5581	15.5445	14.7668	14.7584	17.1455	14.862	15.603	15.0213
mtrain	14265	12591	10099	8829	8835	7323	8840	8622	8785	11565	11572	7623	11410	8446	11113
mae_train	7.61003	7.87964	4.3501	10.1275	9.94048	8.64912	8.37904	8.95058	10.4442	5.53752	5.37998	7.78026	5.52879	7.25056	6.09948
bias_train	-0.00652107	-0.00758609	-5.12934e-05	0.00746468	-0.00248124	0.00468736	-0.0114601	-0.00300661	0.00370946	-0.00349126	0.000831972	-0.00572907	-0.00304869	0.00219954	-0.00147403
R2_train	0.969958	0.96992	0.975298	0.882627	0.89629	0.954811	0.928495	0.92548	0.90439	0.960783	0.963132	0.965636	0.96775	0.948184	0.963262
mae_val	9.2409	9.44418	5.52288	12.5869	12.3493	10.9399	10.7704	11.4892	12.634	6.52408	6.30454	9.56248	6.63068	9.17806	7.29488
bias_val	0.0114369	0.102686	0.094829	0.180904	-0.252725	-0.827679	-0.224883	-0.202399	0.19789	0.329703	0.040179	0.200196	0.220774	-0.213766	0.021017
R2_val	0.936158	0.947745	0.952776	0.795564	0.801313	0.907987	0.854467	0.851693	0.832761	0.934125	0.940744	0.940686	0.944901	0.900698	0.936263
mae_test	9.35208	9.58301	5.90681	13.0795	12.393	11.8428	10.9958	10.8783	12.4225	6.69739	6.38611	9.4984	6.92165	9.7174	7.21032
bias_test	-0.238604	0.0981157	0.184798	0.0699028	-0.307027	-0.444225	0.421063	-0.483266	-0.588288	-0.0186364	-0.131174	-0.358508	0.523473	0.103763	0.290537
R2_test	0.935533	0.94756	0.925001	0.756641	0.792699	0.88967	0.853825	0.863482	0.825182	0.92757	0.92882	0.93845	0.928845	0.899983	0.938972

## Sheet: BARR
	CEC	REA	CEA	FVSconst_ppm	FVSconst_ratio	FVSlinear	FVSmean	FVSopt	FVSsqrt	CECwconst_ppm	CECwconst_ratio	CECwlinear	CECwmean	CECwopt	CECwsqrt
meanT	-0.75023	2.57093	-0.996618	0.547054	0.563924	1.81093	0.583151	0.558666	0.62406	-0.323868	-0.316393	1.09678	-0.0171404	0.633085	-0.0560438
mtrain	5598	3131	5288	1387	1416	1017	1429	1407	1348	2796	2826	1629	2642	1371	2554
mae_train	1.29977	1.95493	0.590781	0.769063	0.794355	0.916648	0.784358	0.854651	1.0832	0.414161	0.40598	0.826567	0.488453	0.569487	0.495561
bias_train	-0.00243521	-0.00343657	-0.00104623	-0.0029967	-0.00291599	-0.00201514	0.000854031	-0.001729	0.00245565	0.00151086	0.00199754	-0.00490648	-0.00175123	-0.00209137	-0.000373755
R2_train	0.981587	0.983236	0.99361	0.970253	0.967983	0.993046	0.977326	0.973342	0.96746	0.995833	0.996104	0.994363	0.995299	0.994104	0.994699
mae_val	2.24234	3.26853	1.02312	1.80647	1.68194	2.62461	1.88629	1.91738	2.51929	0.691611	0.659416	1.79993	0.813886	1.08488	0.963404
bias_val	0.241951	-0.313998	-0.0421589	-0.478108	-0.40758	0.577579	0.0119459	-0.467788	-0.325917	0.0158769	0.00489832	0.045442	0.145064	0.0766244	-0.0427045
R2_val	0.919015	0.933878	0.972105	0.354298	0.687624	0.928219	0.759651	0.631219	0.770335	0.977662	0.983517	0.957703	0.978858	0.970352	0.967974
mae_test	2.25406	3.14315	1.04649	1.78365	1.79768	2.50562	2.24068	1.96707	2.60907	0.806652	0.739085	1.59544	0.971088	1.13014	0.812963
bias_test	0.258951	-0.142122	-0.0455508	0.305955	-0.620791	0.487642	-0.246607	-0.327471	-0.0667522	0.0796215	0.0894691	-0.0223791	0.0805048	-0.208062	0.111812
R2_test	0.930471	0.928535	0.961666	0.612532	0.355847	0.906943	0.767317	0.732207	0.798518	0.980377	0.971605	0.962596	0.971627	0.949428	0.978946

## Sheet: BART
	CEC	REA	CEA	FVSconst_ppm	FVSconst_ratio	FVSlinear	FVSmean	FVSopt	FVSsqrt	CECwconst_ppm	CECwconst_ratio	CECwlinear	CECwmean	CECwopt	CECwsqrt
meanT	11.5544	12.5625	9.23005	12.5352	12.5347	12.3949	12.5371	12.2458	12.5629	11.2655	11.2662	11.8786	11.5688	12.095	11.5246
mtrain	18236	15202	13611	10984	10983	10011	10986	10628	10925	15663	15634	11811	15225	10410	14989
mae_train	7.86624	8.90276	3.61	9.3094	9.16881	7.54176	7.77025	8.69842	9.204	5.58496	5.46827	7.4544	5.81239	7.13626	6.29892
bias_train	0.00125885	0.00571769	-0.00203944	-0.00398772	-0.00345996	-0.00131867	0.00592101	0.00264886	0.00706642	0.000906129	-0.00252787	-0.00631611	-0.00561467	0.00741005	-0.00221524
R2_train	0.978428	0.977308	0.981017	0.922777	0.92142	0.976705	0.957095	0.950328	0.942926	0.973642	0.973864	0.97989	0.978363	0.964808	0.975009
mae_val	9.29222	10.4223	4.59735	11.9101	11.2682	9.34065	9.88114	10.8681	11.533	6.63586	7.03989	9.25406	6.95133	8.82369	7.58405
bias_val	0.493056	0.0478726	-0.119563	0.0775054	-0.290571	-0.246271	-0.311885	-0.506467	-0.373761	0.292121	0.129523	0.0740587	-0.312243	-0.112521	-0.0705072
R2_val	0.96145	0.960489	0.956566	0.860914	0.846627	0.954388	0.914241	0.909954	0.890419	0.958215	0.948756	0.961535	0.963313	0.933358	0.957219
mae_test	9.52958	9.99638	4.64144	11.3744	11.894	9.81198	9.69597	10.5372	11.7758	6.81182	6.546	9.37197	6.82503	9.05903	7.6318
bias_test	0.0341564	-0.14994	-0.144947	-0.822235	0.109737	0.228397	-0.114589	0.288789	0.598867	0.186698	-0.0898115	0.315661	-0.058793	0.472341	-0.0643787
R2_test	0.952839	0.959414	0.956039	0.852577	0.855252	0.949526	0.920603	0.910506	0.890006	0.950786	0.956006	0.958973	0.96145	0.927668	0.956867

## Sheet: BLAN
	CEC	REA	CEA	FVSconst_ppm	FVSconst_ratio	FVSlinear	FVSmean	FVSopt	FVSsqrt	CECwconst_ppm	CECwconst_ratio	CECwlinear	CECwmean	CECwopt	CECwsqrt
meanT	16.8667	17.2965	15.4486	17.4412	17.4762	17.3719	17.4696	17.3776	17.5092	16.8524	16.9072	17.1305	17.009	17.3329	17.0223
mtrain	13735	12185	10128	8403	8422	7414	8432	8222	8342	11626	11653	9286	11499	8077	11271
mae_train	7.34928	7.86973	3.82769	13.6046	13.0496	8.86239	10.7626	9.96393	12.2777	5.79066	5.36448	6.95614	5.57812	7.15945	5.91561
bias_train	-0.00289705	-0.00569897	0.00115337	0.00856985	0.00209116	-0.00108946	-0.000914917	0.00360432	0.00419531	0.00318487	-0.00514252	-0.00233696	0.00160952	0.00356665	-0.00707256
R2_train	0.985855	0.985501	0.987604	0.903561	0.900037	0.97564	0.940641	0.946712	0.926887	0.976429	0.979116	0.984197	0.982278	0.968137	0.980403
mae_val	8.45586	9.33586	4.80008	16.5643	15.6834	11.2762	13.1752	12.5943	15.3557	7.29999	6.65815	8.52192	6.73697	9.27008	7.30564
bias_val	0.0734556	-0.113345	0.1983	-0.475329	0.0225695	-0.322539	-0.556411	-0.0835902	0.0232533	0.189402	0.0310838	-0.141159	0.0222404	0.170669	-0.108826
R2_val	0.976259	0.976584	0.977528	0.80811	0.817364	0.950636	0.889859	0.893958	0.85001	0.959279	0.966561	0.972328	0.970463	0.930277	0.967778
mae_test	8.39174	9.16965	4.9909	15.9249	16.4693	11.3171	12.9092	12.7145	15.5036	7.12744	6.49691	8.61729	6.78859	8.81185	7.03078
bias_test	0.237533	0.194234	0.00366339	-0.184749	0.48978	-0.355511	-0.195382	0.021937	0.190445	0.197474	0.313918	0.178255	0.139187	-0.0106402	0.246367
R2_test	0.980614	0.979429	0.975842	0.829019	0.804849	0.950882	0.89234	0.894395	0.860554	0.959886	0.966149	0.973187	0.97127	0.940296	0.970147

## Sheet: BONA
	CEC	REA	CEA	FVSconst_ppm	FVSconst_ratio	FVSlinear	FVSmean	FVSopt	FVSsqrt	CECwconst_ppm	CECwconst_ratio	CECwlinear	CECwmean	CECwopt	CECwsqrt
meanT	7.33548	8.05709	6.73876	9.3215	9.32607	9.84771	9.33137	9.30887	9.42955	7.60395	7.61475	9.19367	8.00107	9.26135	7.99402
mtrain	12414	9872	10806	6185	6192	5877	6196	6153	6138	11083	11059	8898	10599	6117	10477
mae_train	3.90008	4.55071	1.92451	5.06707	4.96371	4.40662	4.392	3.79122	5.0991	1.79476	1.78839	3.15376	2.02431	2.18652	2.13655
bias_train	-0.00521648	-0.0093228	-0.00101839	-0.00123515	0.00359146	5.87696e-05	0.00238932	0.00158895	-0.00640803	-0.000907369	0.000227135	-0.00314914	0.000656193	-0.0022243	0.00185818
R2_train	0.972555	0.970772	0.983853	0.900951	0.906035	0.955213	0.934111	0.950829	0.921183	0.983647	0.98424	0.975045	0.983504	0.980648	0.982721
mae_val	5.2407	5.58774	2.53947	6.9171	7.04804	6.33981	6.08298	5.5904	7.20178	2.34548	2.32591	4.06659	2.60432	3.16013	2.82906
bias_val	0.151315	0.20177	-0.0135877	0.255848	0.0639969	-0.218835	-0.172228	0.22136	-0.447642	0.0534689	-0.149256	0.0856324	0.00459899	-0.366249	-0.163414
R2_val	0.927013	0.937831	0.958887	0.734821	0.770185	0.858866	0.829787	0.855183	0.757458	0.937665	0.956545	0.947434	0.965104	0.928787	0.951501
mae_test	5.0164	5.87641	2.76541	7.05393	7.01023	6.17066	6.25427	5.32693	7.07077	2.18322	2.29769	4.23639	2.76806	2.98467	2.67977
bias_test	-0.333488	-0.162779	0.154909	-0.121943	-0.252589	0.0994113	-0.090809	0.0754962	-0.289294	-0.00281078	0.0141066	0.257173	0.0318857	0.139174	-0.0921358
R2_test	0.911636	0.915909	0.953504	0.741947	0.726851	0.875912	0.811809	0.823997	0.786795	0.959285	0.956447	0.939743	0.939774	0.949983	0.952857

## Sheet: CLBJ
	CEC	REA	CEA	FVSconst_ppm	FVSconst_ratio	FVSlinear	FVSmean	FVSopt	FVSsqrt	CECwconst_ppm	CECwconst_ratio	CECwlinear	CECwmean	CECwopt	CECwsqrt
meanT	21.7082	21.8635	20.1311	21.6474	21.5815	21.8544	21.568	21.2657	21.6491	21.9322	21.8898	22.737	22.1119	21.1808	22.2007
mtrain	18589	15373	14112	10422	10553	9994	10583	10077	10480	16781	17072	14806	16728	9745	16523
mae_train	9.92439	10.1646	4.54524	12.9381	12.1322	10.7424	10.7093	9.88321	11.639	7.47653	6.70352	7.98648	7.12718	8.33588	7.00877
bias_train	-0.00620361	-0.0118378	0.00103272	0.00225499	-0.000137968	2.60695e-05	0.0116031	-0.00305262	-0.0016988	-0.00543685	-0.00562224	0.00102807	-0.00224607	-0.00514527	-0.00393635
R2_train	0.977638	0.981976	0.974264	0.927412	0.92496	0.950857	0.947647	0.963864	0.928321	0.976465	0.980027	0.979701	0.979982	0.968806	0.980218
mae_val	11.8141	11.643	5.58076	16.5914	15.143	13.156	12.9212	12.9816	14.448	8.51066	7.84807	9.24266	8.32103	10.6156	8.24423
bias_val	-0.136527	0.305608	-0.0650609	0.974874	-0.149014	-0.296938	-0.29674	-0.223226	-0.272641	-0.0908159	0.243328	-0.0521168	-0.121364	-0.398126	-0.2697
R2_val	0.959698	0.966568	0.943759	0.859097	0.862307	0.906168	0.908296	0.918243	0.864464	0.962284	0.970115	0.96766	0.967451	0.932409	0.965679
mae_test	11.4104	11.2267	5.31845	15.7402	14.4632	13.5911	12.6622	12.7444	14.5801	8.849	7.90166	9.57353	8.22503	10.3647	8.20647
bias_test	-0.200926	0.520181	-0.238246	0.204123	-0.280494	-0.450735	0.0205875	-0.100319	-0.15711	-0.229313	-0.174633	-0.276817	0.514284	-0.584977	0.0160232
R2_test	0.958999	0.973228	0.952368	0.87253	0.875454	0.903883	0.902601	0.918479	0.863312	0.962559	0.966682	0.964677	0.969712	0.938372	0.969508

## Sheet: CPER
	CEC	REA	CEA	FVSconst_ppm	FVSconst_ratio	FVSlinear	FVSmean	FVSopt	FVSsqrt	CECwconst_ppm	CECwconst_ratio	CECwlinear	CECwmean	CECwopt	CECwsqrt
meanT	13.796	14.1283	13.2646	14.6343	14.64	14.7574	14.6561	14.5868	14.6709	14.0061	14.0154	14.6432	14.1743	14.5102	14.2236
mtrain	15612	11735	14032	8534	8538	8329	8550	8476	8523	14377	14356	13348	14278	8417	14217
mae_train	6.22517	6.86684	2.58749	6.47056	6.28721	6.3984	6.1575	5.39373	6.54613	2.62098	2.5739	3.26913	2.67015	2.83185	2.56738
bias_train	0.00252771	-0.00397761	0.00163676	-0.00152587	0.00785256	-0.000790268	0.00157741	-0.00204193	0.00797395	0.000576671	-0.0020105	-0.00124092	-0.00156485	7.42075e-05	-0.00348912
R2_train	0.951674	0.955297	0.970222	0.906957	0.908087	0.933327	0.917823	0.939051	0.903792	0.980985	0.981767	0.979161	0.981929	0.980202	0.98247
mae_val	7.53654	8.59161	3.39244	8.42209	8.83703	8.76692	7.98325	7.3397	9.26648	3.15211	3.23952	4.14338	3.48218	4.0522	3.36535
bias_val	-0.208802	-0.0960556	0.0129141	-0.606353	-0.6996	-0.105988	-0.0763319	-0.146532	0.11345	-0.122332	0.177637	-0.0605871	-0.118329	-0.367366	0.0844924
R2_val	0.892891	0.908471	0.928868	0.782506	0.743218	0.83105	0.805972	0.862644	0.756464	0.964849	0.952844	0.955115	0.958135	0.944652	0.959306
mae_test	7.6514	8.8531	3.38879	8.72127	8.42277	8.84619	7.89756	7.31457	8.91656	3.16702	3.23334	4.08984	3.33914	4.15823	3.38362
bias_test	-0.0133009	-0.0928617	0.163863	-0.602061	-0.297079	0.150968	-0.194227	-0.0824339	0.129191	-0.0119184	0.0126331	-0.155211	0.0784648	0.155034	0.0466071
R2_test	0.897138	0.918202	0.928515	0.76916	0.789172	0.825112	0.818559	0.863571	0.750635	0.958879	0.963904	0.957651	0.960282	0.946901	0.960771

## Sheet: DCFS
	CEC	REA	CEA	FVSconst_ppm	FVSconst_ratio	FVSlinear	FVSmean	FVSopt	FVSsqrt	CECwconst_ppm	CECwconst_ratio	CECwlinear	CECwmean	CECwopt	CECwsqrt
meanT	10.9306	13.2587	8.75501	13.6817	13.8069	14.0406	13.8095	13.6937	13.8533	10.7436	10.9314	12.6596	11.4251	13.6238	11.2384
mtrain	15987	12606	13099	6194	6289	5985	6292	6183	6269	13715	13930	11790	13452	6243	13546
mae_train	6.26433	7.51927	3.24799	11.4028	10.9162	9.2673	9.80007	8.68602	11.0788	3.56382	3.36944	5.15908	3.76454	4.80055	3.56709
bias_train	-0.00564055	-9.64603e-05	0.00125066	0.0018202	0.0113504	-0.00159118	-0.00850135	-0.00324385	-0.00551729	-0.00697626	-0.00259784	-0.00288944	-0.0021776	0.00296254	-0.00170649
R2_train	0.984687	0.983741	0.983385	0.867794	0.858227	0.950237	0.906708	0.932029	0.88255	0.982258	0.98456	0.984192	0.985782	0.978421	0.985893
mae_val	7.2761	9.30128	4.16823	16.0215	15.1853	12.9533	13.202	12.3384	15.0272	4.38149	4.15431	6.43678	4.49814	6.88152	4.44813
bias_val	0.215388	-0.367563	0.0236006	-0.407341	-0.533601	0.643576	-0.272752	-0.102475	1.21393	0.0619611	-0.234877	-0.470801	0.0458679	0.164564	-0.0914617
R2_val	0.976358	0.970778	0.96725	0.646915	0.612529	0.883319	0.7843	0.819353	0.698208	0.966398	0.972189	0.966209	0.974748	0.944825	0.975599
mae_test	7.69452	8.91056	4.28118	15.7267	15.1687	12.7262	12.998	11.8294	14.9801	4.51243	4.0075	6.10141	4.6137	6.41759	4.49817
bias_test	0.212076	-0.0862034	0.0377181	-0.0223472	0.568756	0.427243	-0.545072	0.265267	-0.595595	0.0114549	-0.166024	-0.203068	-0.169971	0.0891876	-0.114653
R2_test	0.972547	0.970073	0.964909	0.647395	0.630732	0.878235	0.776875	0.819626	0.708986	0.964458	0.973974	0.973056	0.974877	0.946901	0.974571

## Sheet: DEJU
	CEC	REA	CEA	FVSconst_ppm	FVSconst_ratio	FVSlinear	FVSmean	FVSopt	FVSsqrt	CECwconst_ppm	CECwconst_ratio	CECwlinear	CECwmean	CECwopt	CECwsqrt
meanT	6.83055	7.30083	5.96854	8.63499	8.63824	8.87087	8.64146	8.58767	8.68762	7.7626	7.76022	8.43851	7.91964	8.58223	7.88111
mtrain	15900	13548	13784	7318	7322	7002	7326	7244	7284	14364	14352	12312	13969	7240	13941
mae_train	3.84412	4.32056	2.03931	6.37383	6.16107	5.16896	5.31235	4.94226	6.23435	2.01593	2.04793	3.36992	2.26983	2.68027	2.39314
bias_train	-0.000333863	-0.00521781	-0.00195079	0.00079021	0.0029848	-0.0100967	0.00189762	0.00201126	0.0109398	-0.00267982	-0.00205591	-0.00360912	-0.000763403	0.000360858	-0.00262815
R2_train	0.978086	0.97585	0.982756	0.85307	0.862099	0.937943	0.90386	0.920083	0.88323	0.980249	0.980371	0.975829	0.981601	0.972223	0.979335
mae_val	4.49356	5.40703	2.58168	8.22998	8.59733	7.24203	7.44248	6.57135	8.58611	2.51673	2.47743	4.13123	2.754	3.67655	2.91429
bias_val	-0.0782062	-0.131013	0.0333789	-0.0926205	0.104473	-0.0807206	-0.0351052	-0.0790542	-0.270498	-0.0622692	0.0528934	-0.120105	-0.0779419	-0.446104	-0.00954186
R2_val	0.95487	0.934101	0.958177	0.703638	0.683159	0.857738	0.797228	0.823856	0.744218	0.949035	0.943285	0.954579	0.95165	0.907379	0.952023
mae_test	4.81052	5.39111	2.53054	8.35814	8.59098	7.04383	7.07666	6.40054	8.2854	2.54692	2.51406	4.3265	2.8138	3.66624	3.02576
bias_test	-0.24409	-0.275788	0.238353	0.180318	0.131264	-0.154833	-0.419042	0.0153909	-0.386719	0.0386029	-0.125175	-0.169622	-0.126713	-0.161538	-0.0594001
R2_test	0.929064	0.942489	0.961261	0.716876	0.699634	0.861039	0.787608	0.832352	0.740768	0.93954	0.952242	0.940021	0.955801	0.930219	0.943755

## Sheet: DELA
	CEC	REA	CEA	FVSconst_ppm	FVSconst_ratio	FVSlinear	FVSmean	FVSopt	FVSsqrt	CECwconst_ppm	CECwconst_ratio	CECwlinear	CECwmean	CECwopt	CECwsqrt
meanT	21.0863	21.7063	19.3789	22.6478	22.695	22.6882	22.6922	22.4336	22.7045	21.2714	21.2126	21.6692	21.4865	22.2842	21.3513
mtrain	11361	9925	8187	6264	6326	5869	6334	5982	6275	9696	10070	8106	9733	5861	9606
mae_train	11.6633	11.9744	5.65062	18.5571	17.112	12.7324	14.3329	14.7921	15.3796	10.8495	10.2857	11.646	10.315	12.0955	10.8419
bias_train	0.00704338	0.00535816	-0.000961506	-0.00506358	-0.00934773	0.011237	0.00980532	0.00270594	-0.0016422	-0.00740198	0.00824106	-0.000873891	0.000643132	-0.0102651	0.00512681
R2_train	0.98157	0.983158	0.983167	0.894684	0.897914	0.969488	0.939531	0.947858	0.927539	0.957466	0.961118	0.974147	0.969403	0.961099	0.966493
mae_val	14.754	14.4774	7.6768	26.2068	23.6449	17.5255	19.135	21.0885	21.485	14.5772	12.9665	14.9408	13.0617	17.57	13.3311
bias_val	-0.405714	0.0462777	-0.929815	0.172866	-0.98883	-0.183647	-0.538789	-0.486472	1.90301	0.149725	0.574992	-0.0355957	-0.00213389	0.414188	0.142136
R2_val	0.961929	0.970873	0.950791	0.723846	0.74298	0.926045	0.877529	0.865155	0.833994	0.908899	0.920933	0.949077	0.941892	0.901655	0.932717
mae_test	15.3013	15.1756	7.7944	24.5256	23.1408	16.8414	19.8449	20.8166	20.9972	14.8012	13.5148	15.055	14.3431	17.711	13.4455
bias_test	-0.261054	-0.447287	0.0236048	0.480156	1.01986	-1.13479	-0.344653	0.603799	0.550555	0.932683	-0.140269	0.944528	-0.307244	-0.0442777	-1.15234
R2_test	0.962275	0.967984	0.950784	0.761859	0.769787	0.932938	0.862532	0.863374	0.843243	0.909601	0.91877	0.949942	0.932566	0.89868	0.936447

[truncated: 37 more sheets: DSNY, GRSM, GUAN, HARV, HEAL, JERC, JORN, KONA, KONZ, LAJA, LENO, MLBS, MOAB, NIWO, NOGP, OAES, ONAQ, ORNL, OSBS, PUUM …]
